# Supplementary material for: Affect, Body, and Eating Habits in Children: A Systematic Review
Source: MDPI journal article supplement (doi:10.3390/nu15153343), 2023-07-27
Supplement: s1 [file s1]

**Table S1:** Mixed Methods Appraisal Tool (MMAT).

| Authors             | Screening questions |    | Category of study designs                    |     |     |     |     |                             |     |     |     |     |
|---------------------|---------------------|----|----------------------------------------------|-----|-----|-----|-----|-----------------------------|-----|-----|-----|-----|
|                     |                     |    | 2. Quantitative randomized controlled trials |     |     |     |     | 4. Quantitative descriptive |     |     |     |     |
|                     | S1                  | S2 | 2.1                                          | 2.2 | 2.3 | 2.4 | 2.5 | 4.1                         | 4.2 | 4.3 | 4.4 | 4.5 |
| Farrow et al.       | Y                   | Y  |                                              |     |     |     |     | Y                           | Y   | Y   | C   | Y   |
| Holt & Ricciardelli | Y                   | Y  |                                              |     |     |     |     | Y                           | Y   | Y   | C   | Y   |
| Houldcroft et al.   | Y                   | Y  |                                              |     |     |     |     | Y                           | Y   | Y   | C   | Y   |
| Kirk et al.         | Y                   | Y  |                                              |     |     |     |     | Y                           | Y   | Y   | Y   | Y   |
| Morgan et al.       | Y                   | Y  |                                              |     |     |     |     | Y                           | Y   | Y   | Y   | Y   |
| Saling et al.       | Y                   | Y  |                                              |     |     |     |     | Y                           | Y   | Y   | Y   | Y   |
| Tan & Holub         | Y                   | Y  | C                                            | Y   | Y   | C   | Y   |                             |     |     |     |     |

**Note:** Y = Yes; C = Can't tell
